# Supplementary material
Source: ML conference proceedings conference paper supplement (https://openaccess.thecvf.com/content/CVPR2024/html/Liu_VS_Reconstructing_Clothed_CVPR_2024_paper.html)
Supplement: Supplementary file 2 [file Liu_VS_Reconstructing_Clothed_CVPR_2024_supplemental.zip]

Archive with 3 entries (3 files):
- 10773_supp/CVPR2024_VSnet_supp.pdf
- 10773_supp/Video1.mp4
- 10773_supp/Video2.mp4
